# Supplementary material for: Rapamycin protects chondrocytes against IL-18-induced apoptosis and ameliorates rat osteoarthritis
Source: publisher site journal article supplement (doi:10.18632/aging.102937), 2020-03-17
Supplement: Supplementary file [file aging-v12i6-102937-supplementary-material-SD1.pdf]

## SUPPLEMENTARY FIGURES

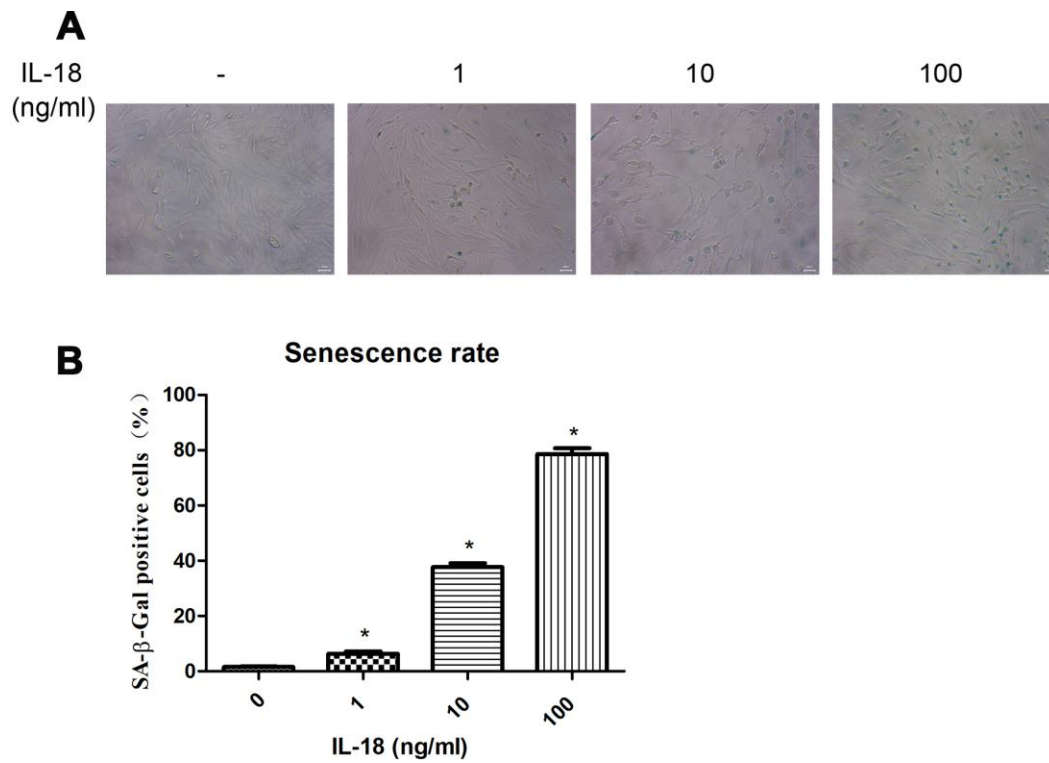

**Supplementary Figure 1. IL-18 stimulation increased the senescence rate of normal rat chondrocytes.** The chondrocytes were treated with IL-18 at different concentrations for 24 h. The SA-β-Gal positive cells (A) were observed under a microscope (Scale bar = 20 μm), and the percentage of SA-β-Gal positive cells (B) was calculated (n=3). The values are expressed as mean ± standard deviation (SD). Significance was calculated by a one-way ANOVA with a *post hoc* Tukey's multiple comparisons test. \*p<0.05 versus 0 ng/ml IL-18 treated group.

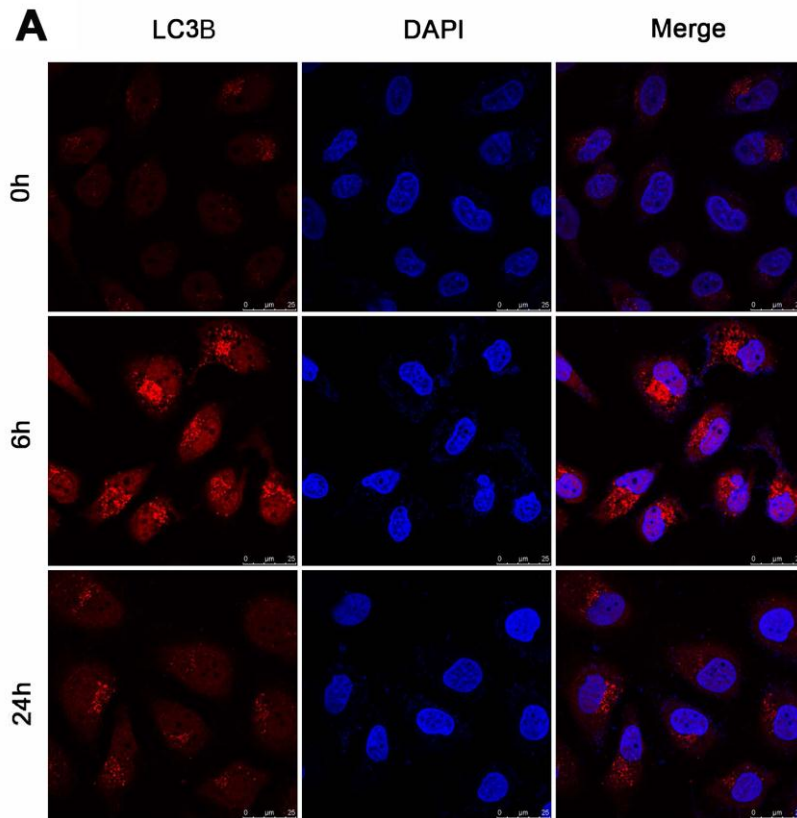

**Supplementary Figure 2. IL-18 stimulation repressed the autophagy of rat chondrocytes.** The chondrocytes were incubated without or with IL-18 (100 ng/ml) for various durations. Immunofluorescence of LC3B in treated cells (red: LC3B; blue: DAPI) was evaluated (A). Bar = 25  $\mu$ m.
